# Supplementary material for: Weighted Gene Co-Expression Network Analysis Reveals Key Genes and Potential Drugs in Abdominal Aortic Aneurysm
Source: MDPI journal article supplement (doi:10.3390/biomedicines9050546), 2021-05-13
Supplement: s1 [file s1]

Supplementary Figures

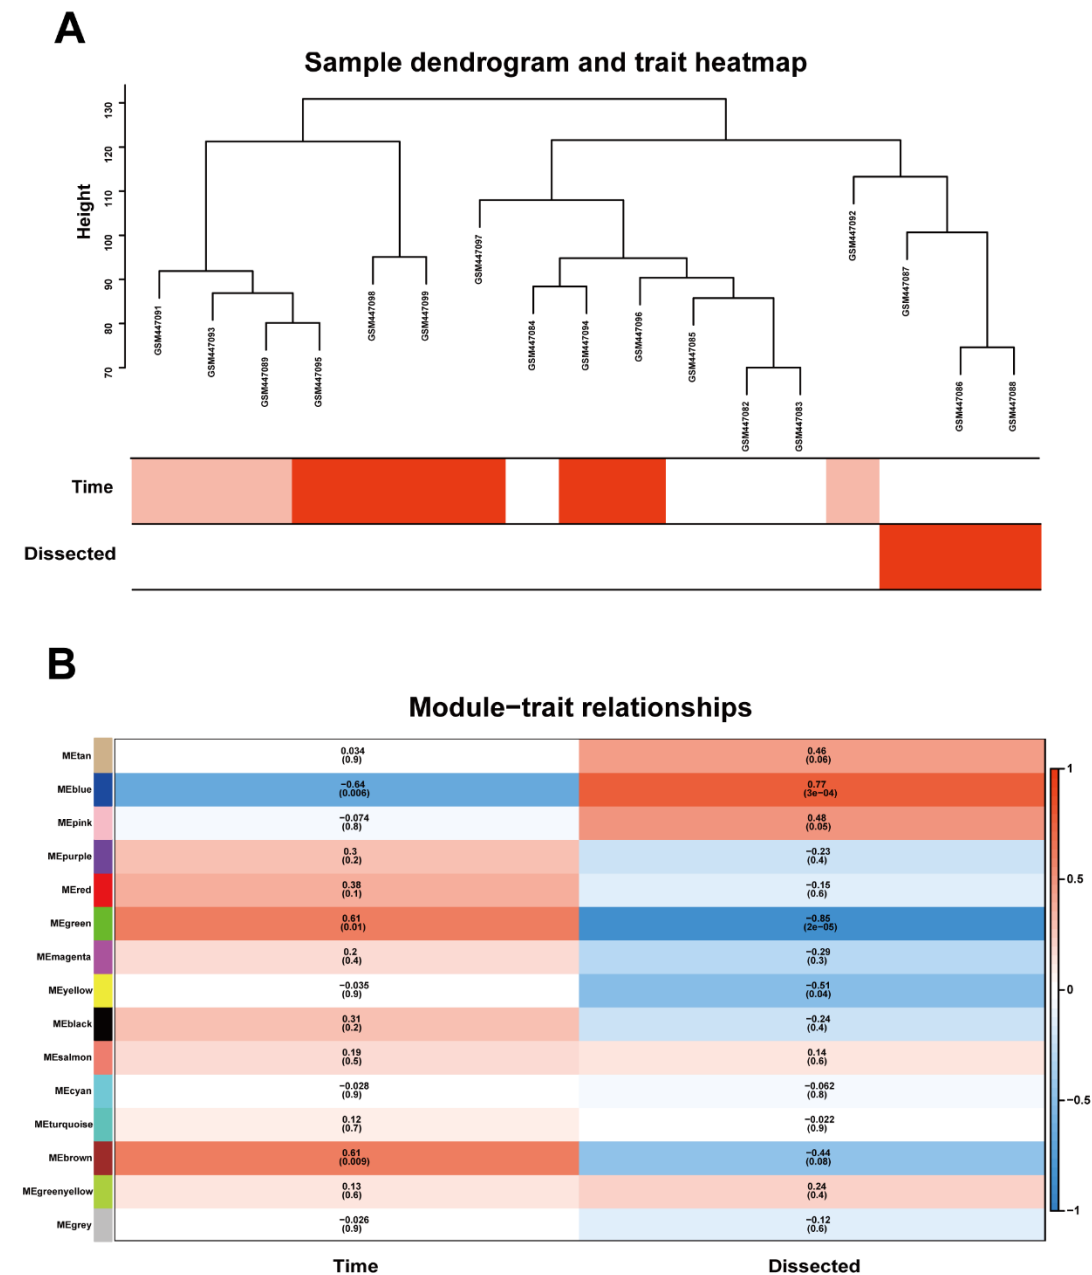

Supplementary Figure S1. Sample clustering and module relations to sample traits. (A) Sample dendrogram and trait heatmap. The color intensity of time was proportional to the day of the sample collected. The red color in dissected represents the occurrence of dissection in the sample; (B) Module trait relationships. Each row corresponds to a module eigengene (ME) and each column to a sample trait.

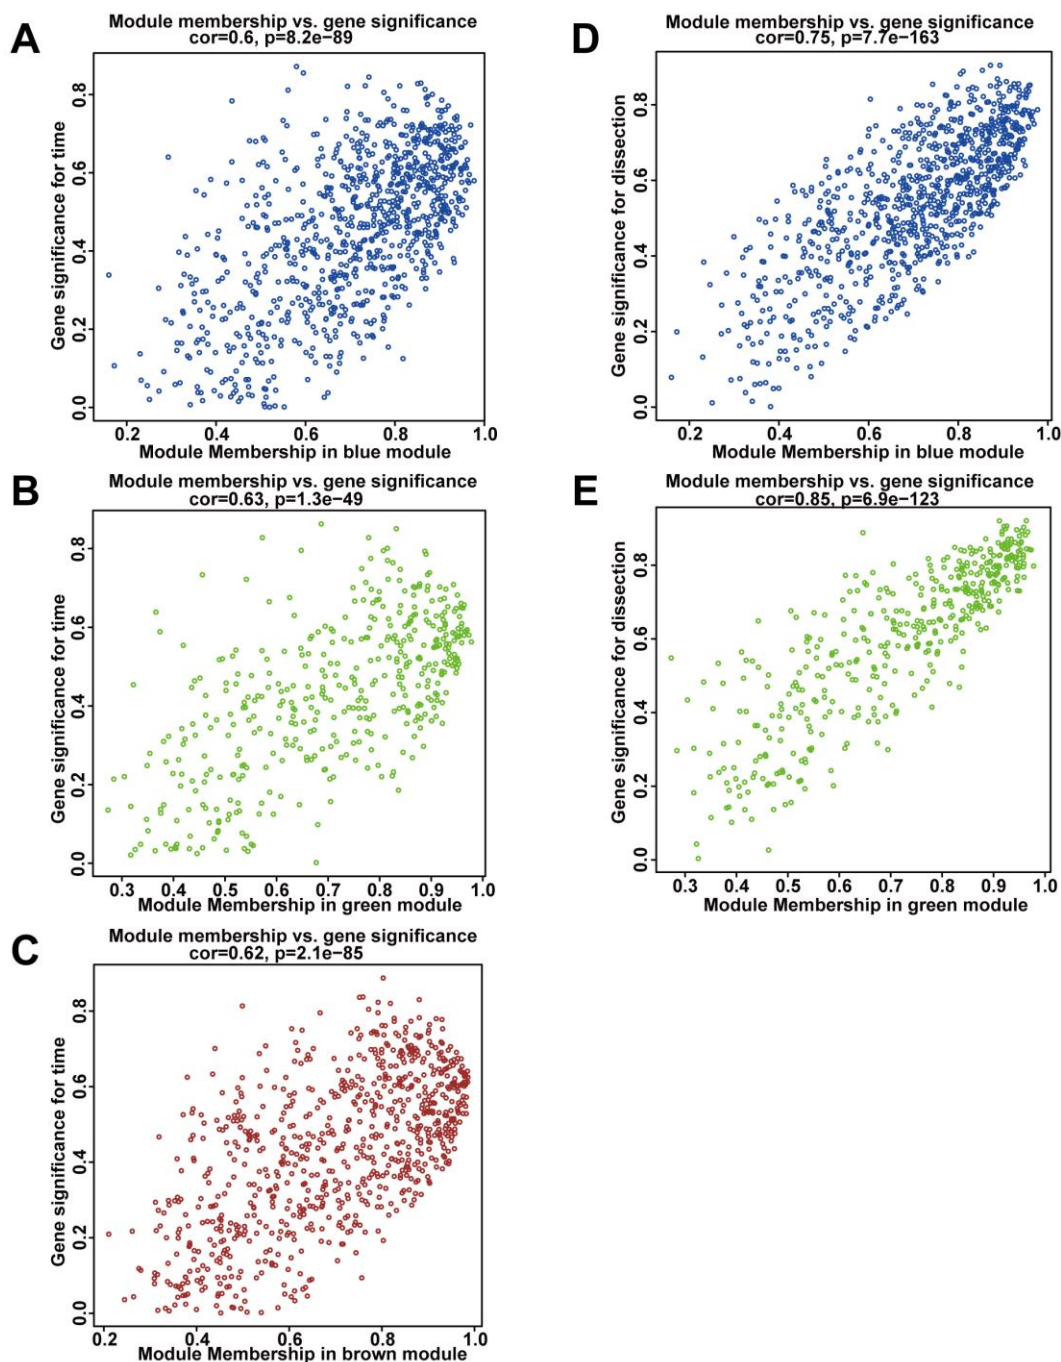

Supplementary Figure S2. Correlation of the module membership and the gene significance. (A-C) The relationship between gene significance of time and module membership; (D-E) The relationship between gene significance of dissection and module membership. The color indicates the module, and the dot indicates the gene within the module.

#### Supplementary Table

Table S1. Potential target agents identified based on drug-gene interaction in DGIdb database.

| Gene symbol | Gene name                                      | Target agent            | Drug-gene Interaction | Query Score | Interaction Score |
|-------------|------------------------------------------------|-------------------------|-----------------------|-------------|-------------------|
| ACACB       | Acetyl-CoA Carboxylase Beta                    | CHEMBL378186            | NA                    | 4.45        | 8.74              |
|             |                                                | Adenine                 | NA                    | 4.45        | 8.74              |
|             |                                                | PF-05175157             | NA                    | 4.45        | 8.74              |
|             |                                                | CHEMBL208943            | NA                    | 4.45        | 8.74              |
|             |                                                | Firsocostat             | Allosteric modulator  | 2.22        | 4.37              |
|             |                                                | Biotin                  | Cofactor              | 1.33        | 2.62              |
|             |                                                | Metformin               | NA                    | 0.11        | 0.22              |
| ACSL1       | Acyl-CoA Synthetase Long Chain Family Member 1 | Adenosine monophosphate | NA                    | 0.89        | 6.12              |
|             |                                                | Adenosine triphosphate  | NA                    | 0.23        | 1.61              |
|             |                                                |                         |                       |             |                   |
| ADCY5       | Adenylate Cyclase 5                            | CHEMBL401844            | NA                    | 2.22        | 10.2              |
|             |                                                | Aurothioglucoase        | NA                    | 1.48        | 6.8               |
|             |                                                | Colforsin               | NA                    | 0.74        | 3.4               |
| CCR5        | C-C motif chemokine receptor 5                 | Maraviroc               | Antagonist            | 31.15       | 19.47             |
|             |                                                | Vicriviroc              | Antagonist            | 26.7        | 16.69             |
|             |                                                | Leronlimab              | Antagonist            | 22.25       | 13.91             |
|             |                                                | CHEMBL207004            | Antagonist            | 17.8        | 11.13             |
|             |                                                | INCB-9471               | Antagonist            | 13.35       | 8.34              |
|             |                                                | Cenicriviroc            | Antagonist            | 8.9         | 5.56              |
|             |                                                | AZD5672                 | Antagonist            | 8.9         | 5.56              |
|             |                                                | Aplaviroc               | Antagonist            | 8.9         | 5.56              |
|             |                                                | Ancriviroc              | Antagonist            | 4.45        | 2.78              |
|             |                                                | Vicriviroc Maleate      | Antagonist            | 4.45        | 2.78              |
|             |                                                | Anibamine               | NA                    | 4.45        | 2.78              |
|             |                                                | Variecolin              | NA                    | 4.45        | 2.78              |
|             |                                                | CHEMBL255858            | NA                    | 4.45        | 2.78              |
|             |                                                | CHEMBL495654            | NA                    | 4.45        | 2.78              |
|             |                                                | PF-232798               | NA                    | 4.45        | 2.78              |
|             |                                                | Nifeviroc               | NA                    | 4.45        | 2.78              |
|             |                                                | Aplaviroc hydrochloride | Antagonist            | 2.22        | 1.39              |
|             |                                                | CHEMBL41275             | Antagonist            | 2.22        | 1.39              |
|             |                                                | PF-04634817             | Antagonist            | 2.22        | 1.39              |
|             |                                                | CHEMBL2018969           | Antagonist            | 2.22        | 1.39              |
|             |                                                | Mavorixafor             | NA                    | 2.22        | 1.39              |
|             |                                                | Ibalizumab              | Antagonist            | 1.11        | 0.7               |
|             |                                                |                         |                       |             |                   |
| LPIN1       | Lipin 1                                        | Rosiglitazone           | NA                    | 0.28        | 3.82              |
